# Supplementary material for: Do Metabolomics and Taxonomic Barcode Markers Tell the Same Story about the Evolution of Saccharomyces sensu stricto Complex in Fermentative Environments?
Source: Microorganisms. 2020 Aug 15;8(8):1242. doi: 10.3390/microorganisms8081242 (PMC7463906; doi:10.3390/microorganisms8081242)
Supplement: Supplementary file 1 [file microorganisms-08-01242-s001.xlsx]

## Sheet: Table S1
Table S1.
Sample	Phenotype	Ethanol % (v/v)	(2E)-3-(methoxycarbonyl)pent-2-enedioic acid	(N(omega)-L-arginino)succinic acid	(R)-Carnitine	1-Methyladenosine	1-pyrroline-3-hydroxy-5-carboxylic acid	2-(3-Carboxy-3-aminopropyl)-L-histidine	2-Aminoacrylic acid	2-Aminobutyrate	2'-Deoxyadenosine	2'-Deoxyguanosine	3-(indol-3-yl)pyruvic acid	4-(Glutamylamino) butanoate	4-deoxypyridoxine	4-Hydroxy-L-threonine	4-Methylthiazoleethanol	5-(hydroxymethyl)-2-methyl-4(1H)-pyrimidinone	5-Ethyl-2,4-dimethyloxazole	5'-S-methyl-5'-thioadenosine	7,8-diaminononanoic acid	Acetylcarnitine DL	Acetyllysine	Adenine	Adenosine 2'-phosphate	Anserine	Anthranilate	Betaine	Carnosine	Cinnamic acid	Citrulline	Cytidine	D-Alanine	D-Asparagine	Dethiobiotin	D-Glutamine	D-Histidine	Diaminopimelic acid	Dimethyl-L-arginine	DL-Pipecolic acid	D-Methionine	D-Phenylalanine	D-Proline	D-Serine	D-Threonine	D-Tryptophan	D-Tyrosine	Ethyl 2-pyrrolecarboxylate	Ethyl-2-butenoate
A-0	CBS 380	0	823.11	3375.83	46645	1081.55	137650	1238.41	2768.23	44763.8	0	32500.9	0	6205.72	815.11	1307.95	3436.42	2433.79	918	10616.5	7804.77	19246.4	16437.1	1726.11	7843.4	610.68	27860.6	425086	5565.48	0	1506.84	42138.4	37805.9	154696	0	185016	309557	624.03	14990	28414.5	54987.7	54822.8	51955.7	6262.46	77279.6	13390.9	50901.9	944.65	7273.43
A-8	CBS 380	8	0	3612.73	42052.2	1277.26	116556	2481.94	2733.09	45033.9	0	48846.6	0	4910.32	669.9	1307.11	3613.81	3350.72	542.96	10559.1	4617.5	10692.1	9155.76	1767.48	27375	919.56	42415.9	439943	5198.71	1161.04	1102.04	40020.5	31682.7	148416	0	183292	272223	0	11788.7	22733.5	62218.3	73284.9	44903.4	6704.27	87156.4	23379.5	60344.4	797.48	5287.53
A-12	CBS 380	12	0	3217.57	43754.1	1103.01	116859	0	4469.6	38582.2	0	259494	0	6936.95	606.09	4230.63	2988.46	4077.17	0	10788.9	5628.12	4938.27	9304.18	3273.66	47794.2	0	35938.7	424920	4887.95	0	723.75	42246.6	30480.2	147890	0	178874	273985	0	12108.1	21701.9	55142.4	87887.7	44657.2	6057.41	89682.9	24667.6	65229.3	784.27	1449.66
A-16	CBS 380	16	524.94	17289.2	38449.2	856.89	108023	2566.9	4687.91	23414.4	0	1.50485e+06	0	5181.71	623.89	18242.4	3094.37	3413.28	0	11111.1	1842.13	2156.92	8912.11	15501.9	6396.91	0	12033.8	389432	6323.86	0	0	42623.5	28990.5	146940	0	189700	262322	0	7315.85	17232.6	21694	123350	43865.9	6465.09	106606	25845.7	81501	904.93	832.08
B-0	CBS 432	0	0	16333.9	22745.6	12071.1	201098	32902.4	12073.6	7180.04	0	1.42487e+06	3927.43	23706.2	9773.66	24332.6	2908.69	15472	11007.9	29687.5	30566.2	735.35	299602	15068.5	1083.28	557.52	7744.37	622325	34017.1	5217.7	2698.17	27379.8	31904.2	108685	30912.8	177799	495713	13917.9	19608.6	59528.8	98093.7	498715	349887	27855.2	205429	125544	326623	1653.57	2529.1
B-8	CBS 432	8	0	8390.57	32010.1	12044.1	191604	30781.7	13466.8	12004.5	0	1.41361e+06	4333.32	19584.6	917.28	19776.9	2527.23	13780.2	11221.2	34139.9	25299.8	2373.58	310508	14226.2	1324.44	987.51	3963.08	618768	32638.6	5323.29	2041.04	44749.5	31672.4	117889	32108.2	188874	477835	13232.4	21164	56823.6	103798	500357	342742	27227.1	202798	132868	323828	1489.25	1465.13
B-12	CBS 432	12	0	6894.72	33476	10810.9	181613	32444.9	14152.5	12117.2	0	1.48903e+06	5014.84	19586.5	820.28	19208.3	2117.59	18791	10136.7	92876.9	40948.9	1832.13	282268	16178.3	1884.7	0	2763.65	638503	31047.3	4355.54	2609.83	50122.4	33959.2	113176	40790.2	164974	506757	11766	25615	74594.6	114928	524371	369743	26650.5	229910	133651	339462	2183.99	1721.48
B-16	CBS 432	16	4395.64	4644.24	15914.5	11069.4	184019	34780.7	17296.8	10437	0	1.45794e+06	28799.1	12656.2	14739	10549.5	3028.01	12346.1	7654.98	40998.8	11961.8	5491.61	196581	14589.9	3011.53	760.65	3897.81	498553	29617	6211.96	993.78	54662.1	18894.5	116693	31402.6	247533	508559	8995.79	9376.23	64382.8	117107	497784	282254	24775.5	239853	120423	328356	24056.5	1227.75
C-0	CBS 1171	0	4242.78	12652.2	32617.9	9723.02	228604	27064.2	17571	9830.75	0	1.54193e+06	30988.5	32994.7	18110.1	6066.19	2790.11	28949.4	2902.47	42887.5	43555.6	40243.3	98643.9	16562.8	5714.24	731.85	2956.37	682493	25900.8	5822.25	3616.31	35269	10459.1	114156	51442.9	208239	504843	15143.2	31010.4	48685.5	139160	530980	366072	6334.44	219326	134576	338386	32138.6	3551.56
C-8	CBS 1171	8	4080.7	12711.4	36969.8	10553.3	244704	35042.4	18851.9	8778.57	0	1.51844e+06	33280.7	30701.8	19131.4	3451.19	2234.85	28740.4	2347.88	44601.1	47176	49789.1	94107.8	14767.1	7219	1037.31	1921.51	703775	29580.4	6393.02	2430.71	28922.4	10303.2	132264	64121.8	224087	508079	16043.6	26914.4	51371.6	152307	566899	380594	7485.25	226158	123803	364909	32247.6	2595.45
C-12	CBS 1171	12	3649.91	10684.3	31947	9839.03	258754	35079.9	24314.7	22190	0	1.51541e+06	41527.9	25369.2	21368.2	4928.15	2914.51	31369.7	2294.36	59674.9	48007.2	61725.9	75762.1	14233.5	8812.12	748.5	2197.55	739676	29524	7496.22	2108.4	27950.8	11152.6	181902	73110.4	252267	523530	13105.9	29481.6	58173.8	173200	633515	351942	7402.82	258228	180189	433953	36237.1	3728.9
C-16	CBS 1171	16	3500.73	4683.25	17572.3	5958.1	215681	28092.4	30407.1	21771.9	0	1.45925e+06	44252.3	19917.2	19573.8	2779.22	2759.81	20635	1359.38	61095.7	28725.8	43749.7	58119.6	13826	3570.28	554.25	9299.48	664397	17754.7	8589.5	1053.01	33394.3	12670.7	244860	71060.3	302074	529024	10650.6	20574.3	59799.4	187475	631904	284128	7390.32	275198	170610	470027	33451.7	2015
D-0	CBS 1538	0	3928.01	136077	446588	7214.12	197120	9525.44	0	5651.65	79617.2	183278	5845.78	25132.7	5084.93	2685.96	15098.6	0	3857.57	22089.6	18217.7	234179	87164.2	3100.06	52470.3	27804.8	155246	185073	71110.2	1294.66	19787.7	48463.1	10462.9	58284.3	0	18445.7	468895	562	29098	31453.9	55587.9	93448	216621	4315.74	73266.6	33191.9	100837	9207.01	99330.2
D-8	CBS 1538	8	4187.38	71071.1	413276	4933.14	186902	4782.37	0	8674.46	75575.4	360733	5390.45	19480.4	4041.6	5351.41	13973.3	0	2974.15	39276.8	22029.1	269957	71127.2	4592.45	88783.6	28005.6	205007	169689	73516.9	1945.06	15046.1	38694.4	10678.8	56745.3	0	29617.6	468229	0	25440.1	45867.8	49180.4	110304	216369	3513	68335.4	34016.9	94418.1	9081.33	108364
D-12	CBS 1538	12	3276.12	66643.5	417872	1774.03	195833	3228.75	870.96	6718.24	118477	290390	5942.77	18431.2	3643.16	16736.8	13496.5	0	2614.15	40061.9	22029.5	242399	65431.1	3769.96	77800.4	28291.3	321384	168534	68859.6	1413.08	9963.04	29619.2	10448.4	66670.2	0	66973.9	471510	0	28095	45043.7	48439.8	71806.8	211396	3457.61	68465.6	31540.5	97707.5	9499.83	105843
D-16	CBS 1538	16	3365.11	15180.4	322866	2868.25	157941	840.6	8689.94	4617.44	85242.4	1.50736e+06	3755.34	11597.5	2657.98	110884	7997.86	0	1483.38	51330.2	21156.5	94729.4	41083.5	15918.8	26194.1	20137.9	5248.67	113947	58111.8	906.93	4794.05	34930.5	6590.05	37777.2	0	86825.1	423600	0	21708.9	57951.6	8634.93	70826.6	128559	3772.47	24109.6	15104	60875.6	4862.14	72981
[truncated: 42 more columns]

## Sheet: Table S2
Table S2.
	Peaks(mz/rt)	Comp. 1	Comp. 2	Comp. 3
1	Glycerophosphocholine	3.407	3.0107	2.8771
2	N-Acetylornithine	3.188	2.9464	2.7831
3	L-Arginine	2.5681	1.9474	1.8928
4	Acetyllysine	2.5261	2.5567	2.4178
5	Betaine	2.3842	2.4214	2.2877
6	Ornithine	1.7998	1.6	1.5099
7	D-Histidine	1.7962	1.4898	1.4451
8	L-Lysine	1.7695	1.2516	1.181
9	Niacinamide	1.5983	1.98	1.8685
10	Uridine	1.5196	1.0759	1.0163
11	D-Glutamine	1.5067	1.6862	1.5912
12	D-Asparagine	1.3753	1.403	1.341
13	Norleucine	1.3076	1.0161	1.3105
14	Acetylcarnitine DL	1.2476	0.93876	0.99256
15	Gamma-Glutamylcysteine	1.1197	2.1484	2.04
16	Ethyl 2-pyrrolecarboxylate	1.1082	0.9706	0.92938
17	D-Alanine	1.0962	0.81213	0.78042
18	D-Serine	1.0864	0.87602	0.82662
19	Spermidine	1.0456	0.77133	0.75359
20	R-Carnitine	1.0437	1.0422	1.212
21	D-Threonine	1.0008	0.87403	0.87507
22	3-indol-3-ylpyruvic acid	0.975	0.85921	0.83089
23	DL-Pipecolic acid	0.97001	0.69099	0.65215
24	L-Cystathionine	0.95251	0.87515	0.84143
25	O-Succinyl-L-homoserine	0.91481	0.71554	0.67524
26	1-pyrroline-3-hydroxy-5-carboxylic acid	0.90235	0.98547	0.9502
27	4-Hydroxy-L-threonine	0.81745	0.7608	0.72019
28	L-gamma-Glutamyl-L-alanine	0.74451	0.93993	0.92239
29	N-Acetyl-DL-serine	0.71662	0.54902	0.86042
30	L-histidinol	0.68486	0.68677	0.64808
31	2-Aminobutyrate	0.67882	0.76756	0.74301
32	Pantothenic acid	0.66792	0.63252	0.59703
33	Nicotinic acid	0.64948	0.46133	0.46575
34	Nomega-L-argininosuccinic acid	0.62489	0.76692	0.79412
35	N-acetyl-D-proline	0.57331	0.40523	0.38262
36	2'-Deoxyadenosine	0.55705	0.59347	0.62003
37	D-Tyrosine	0.55424	0.40399	0.69759
38	keto-phenylpyruvic acid	0.55003	0.48487	0.51017
39	5-Ethyl-2,4-dimethyloxazole	0.54221	0.53923	0.50894
40	N-Acetylputrescine	0.52815	0.61172	0.57813
41	Ethyl-2-butenoate	0.52643	0.54463	0.60965
42	D-Phenylalanine	0.48536	0.34782	0.87791
43	4-Glutamylamino butanoate	0.47639	0.34772	0.34092
44	2E-3-methoxycarbonylpent-2-enedioic acid	0.41738	0.34886	0.3292
45	Cytidine	0.41683	0.54674	0.55643
46	N,N-dimethylformamide	0.40711	0.39971	0.41791
47	Dethiobiotin	0.40709	0.38125	0.4639
48	4-deoxypyridoxine	0.39083	0.32369	0.33828
49	Adenosine 2'-phosphate	0.3872	0.30853	0.38444
50	Nicotinamide ribotide	0.34467	0.63365	0.60705
51	maleylacetic acid	0.34163	0.38826	0.40894
52	Guanosine	0.32745	0.62247	0.71566
53	5-hydroxymethyl-2-methyl-41H-pyrimidinone	0.32176	0.39461	0.4276
54	Anserine	0.31989	0.33662	0.35535
55	Pyridoxine	0.3161	0.30624	0.30116
56	Anthranilate	0.30944	0.41455	0.61794
57	L-3-Hydroxykynurenine	0.29784	0.31494	0.31305
58	N1-Acetylspermidine	0.29556	0.31965	0.30778
59	S-Lactoylglutathione	0.29153	0.24461	0.23503
60	7,8-diaminononanoic acid	0.28608	0.33072	0.36689
61	5'-S-methyl-5'-thioadenosine	0.27935	0.42768	0.4315
62	2-3-Carboxy-3-aminopropyl-L-histidine	0.26381	0.33297	0.35369
63	Citrulline	0.26371	0.25621	0.27285
64	Pyridoxamine	0.25158	0.44715	0.44983
65	Pantetheine 4'-phosphate	0.21023	0.16141	0.18495
66	Methioninesulfoxide	0.19922	0.39655	0.37562
67	2'-Deoxyguanosine	0.18861	0.41607	1.5363
68	D-Methionine	0.18557	0.89309	0.85569
69	Carnosine	0.18412	0.60766	0.59881
70	Saccharopine	0.16907	0.93284	1.1542
71	D-Tryptophan	0.16719	0.1392	0.41655
72	1-Methyladenosine	0.15282	0.25653	0.24942
73	Dimethyl-L-arginine	0.1384	0.39733	0.3825
74	L-Aspartic acid	0.12304	0.45579	0.54227
75	Inosine	0.11513	0.18901	0.28834
76	Glutathione	0.10003	2.1889	2.0972
77	D-Proline	0.080997	0.50596	0.66796
78	4-Methylthiazoleethanol	0.068642	0.099079	0.16887
79	Adenine	0.058507	0.041582	0.14873
80	Diaminopimelic acid	0.049339	0.035885	0.15579
81	2-Aminoacrylic acid	0.048138	0.21719	0.25613
82	Guanine	0.039813	1.1866	1.2488
83	S-Adenosylhomocysteine	0.022967	0.38605	0.36984
84	Cinnamic acid	0.0061216	0.020387	0.087758

## Sheet: Table S3
Table S3.
	Peaks(mz/rt)	Comp. 1	Comp. 2	Comp. 3
1	Glycerophosphocholine	3.2874	2.937	2.9367
2	N-Acetylornithine	3.2188	2.693	2.6913
3	Acetyllysine	2.7169	2.3694	2.3683
4	Betaine	2.3461	2.4801	2.4785
5	N-Acetyl-DL-serine	2.1081	1.5551	1.554
6	D-Histidine	1.6139	1.2431	1.243
7	Acetylcarnitine DL	1.5434	1.3504	1.3496
8	Gamma-Glutamylcysteine	1.5038	2.1488	2.1472
9	Ornithine	1.4941	1.447	1.446
10	D-Glutamine	1.4768	1.584	1.5832
11	D-Asparagine	1.3202	1.2394	1.2395
12	L-Arginine	1.2725	0.95925	0.96161
13	Spermidine	1.2533	1.0694	1.0689
14	Norleucine	1.2125	1.1107	1.1146
15	Ethyl 2-pyrrolecarboxylate	1.1658	1.0325	1.0318
16	Glutathione	1.1506	1.9601	1.9599
17	D-Alanine	1.1505	0.82735	0.82708
18	D-Serine	1.1003	0.83774	0.83714
19	Niacinamide	1.0773	1.7743	1.773
20	3-indol-3-ylpyruvic acid	1.0416	0.95562	0.95503
21	Cytidine	1.028	0.73861	0.7386
22	L-Cystathionine	1.0203	0.87334	0.87274
23	R-Carnitine	1.0006	1.4418	1.4415
24	L-gamma-Glutamyl-L-alanine	0.99248	1.0744	1.0738
25	D-Threonine	0.97348	1.101	1.1003
26	Uridine	0.97311	0.83826	0.83793
27	S-Adenosylhomocysteine	0.9005	0.95097	0.95031
28	O-Succinyl-L-homoserine	0.88252	0.65543	0.65495
29	DL-Pipecolic acid	0.87011	0.63283	0.63236
30	4-deoxypyridoxine	0.86748	0.79419	0.79364
31	Saccharopine	0.86316	0.68433	0.68756
32	Nicotinamide ribotide	0.84337	0.68796	0.68747
33	4-Hydroxy-L-threonine	0.82285	0.72087	0.72042
34	2-Aminobutyrate	0.78447	0.647	0.64754
35	7,8-diaminononanoic acid	0.75246	0.67425	0.67403
36	Pantothenic acid	0.73154	0.69679	0.69639
37	D-Tryptophan	0.72321	0.54976	0.55073
38	keto-phenylpyruvic acid	0.67215	0.49024	0.49042
39	Dethiobiotin	0.65566	0.758	0.75806
40	N-acetyl-D-proline	0.64092	0.4625	0.46216
41	Ethyl-2-butenoate	0.60712	0.80981	0.80946
42	5-Ethyl-2,4-dimethyloxazole	0.58438	0.51539	0.51509
43	Nomega-L-argininosuccinic acid	0.57577	0.65129	0.65091
44	N-Acetylputrescine	0.57185	0.61741	0.61696
45	2'-Deoxyadenosine	0.5558	0.72701	0.72659
46	4-Glutamylamino butanoate	0.51919	0.44635	0.44623
47	N1-Acetylspermidine	0.49828	0.42195	0.42169
48	L-Lysine	0.48603	0.3505	0.35075
49	5'-S-methyl-5'-thioadenosine	0.47629	0.35352	0.35346
50	2E-3-methoxycarbonylpent-2-enedioic acid	0.47592	0.35427	0.35401
51	Nicotinic acid	0.46702	0.52237	0.5227
52	Guanine	0.43814	1.352	1.3521
53	S-Lactoylglutathione	0.40417	0.32479	0.32462
54	Pyridoxamine	0.389	0.34254	0.3432
55	1-pyrroline-3-hydroxy-5-carboxylic acid	0.38721	0.83553	0.83531
56	5-hydroxymethyl-2-methyl-41H-pyrimidinone	0.37671	0.57198	0.57175
57	D-Tyrosine	0.3657	0.75351	0.7557
58	Anthranilate	0.35838	0.79829	0.79926
59	Pyridoxine	0.3579	0.26647	0.26629
60	D-Phenylalanine	0.34323	0.911	0.9145
61	N,N-dimethylformamide	0.32691	0.55113	0.55076
62	Carnosine	0.32288	0.64324	0.64276
63	L-histidinol	0.32193	0.62626	0.62615
64	Anserine	0.31248	0.42274	0.42252
65	maleylacetic acid	0.24337	0.41197	0.41177
66	L-3-Hydroxykynurenine	0.23873	0.19653	0.19703
67	Citrulline	0.22119	0.28942	0.28927
68	D-Proline	0.21414	0.18978	0.20228
69	L-Aspartic acid	0.20217	0.65091	0.65093
70	Adenosine 2'-phosphate	0.19355	0.33845	0.34049
71	1-Methyladenosine	0.17285	0.13032	0.13088
72	D-Methionine	0.1683	1.0282	1.0275
73	Inosine	0.14873	0.4195	0.41983
74	2'-Deoxyguanosine	0.13441	0.66981	0.69063
75	Adenine	0.090613	0.09604	0.097102
76	Pantetheine 4'-phosphate	0.082083	0.12474	0.12547
77	Diaminopimelic acid	0.038337	0.15847	0.15936
78	2-Aminoacrylic acid	0.036851	0.30286	0.30295
79	4-Methylthiazoleethanol	0.03588	0.185	0.18531
80	2-3-Carboxy-3-aminopropyl-L-histidine	0.033345	0.20031	0.20162
81	Methioninesulfoxide	0.030071	0.43241	0.43217
82	Guanosine	0.020526	0.65324	0.65454
83	Cinnamic acid	0.014643	0.11112	0.11131
84	Dimethyl-L-arginine	0.0036318	0.17795	0.1781

## Sheet: Table S4
Table S4.
	Peaks(mz/rt)	Comp. 1	Comp. 2	Comp. 3
1	Glycerophosphocholine	3.992	3.582	3.5819
2	N-Acetylornithine	3.0043	2.527	2.5268
3	Acetyllysine	2.4731	2.1685	2.1684
4	N-Acetyl-DL-serine	2.2397	1.7882	1.788
5	Ornithine	2.0756	1.8078	1.8076
6	L-Arginine	1.8416	1.4515	1.4516
7	Betaine	1.8098	2.2578	2.2576
8	Acetylcarnitine DL	1.7043	1.4339	1.4338
9	L-Lysine	1.49	1.282	1.2819
10	Glutathione	1.2755	1.7574	1.7575
11	Gamma-Glutamylcysteine	1.2711	1.7475	1.7474
12	Niacinamide	1.2344	1.6117	1.6116
13	D-Histidine	1.202	1.1191	1.1191
14	Ethyl 2-pyrrolecarboxylate	1.2005	1.0147	1.0146
15	3-indol-3-ylpyruvic acid	1.1552	0.99535	0.99526
16	L-Cystathionine	1.1305	0.93127	0.93118
17	Pantothenic acid	1.1202	0.99699	0.99689
18	D-Alanine	1.0993	0.86929	0.86923
19	Cytidine	1.0957	0.87273	0.87269
20	2'-Deoxyguanosine	1.0823	1.2255	1.2264
21	L-gamma-Glutamyl-L-alanine	1.0623	0.98937	0.9893
22	D-Serine	1.007	0.79951	0.79944
23	R-Carnitine	0.97837	1.2065	1.2066
24	S-Adenosylhomocysteine	0.9741	0.90717	0.90708
25	DL-Pipecolic acid	0.94228	0.74371	0.74364
26	4-deoxypyridoxine	0.89796	0.77574	0.77567
27	O-Succinyl-L-homoserine	0.85591	0.6703	0.67024
28	5'-S-methyl-5'-thioadenosine	0.83958	0.73839	0.7384
29	Anthranilate	0.82748	1.0219	1.022
30	Uridine	0.8046	0.76609	0.7661
31	2'-Deoxyadenosine	0.69817	0.8024	0.80236
32	Ethyl-2-butenoate	0.68196	0.75458	0.75454
33	Norleucine	0.67934	0.87664	0.87739
34	D-Glutamine	0.67659	1.3494	1.3493
35	4-Hydroxy-L-threonine	0.67414	0.64434	0.64428
36	Dethiobiotin	0.66092	0.62778	0.62784
37	D-Threonine	0.64708	0.94406	0.944
38	D-Asparagine	0.59371	1.1569	1.1569
39	N-Acetylputrescine	0.58228	0.56609	0.56603
40	Nomega-L-argininosuccinic acid	0.5697	0.58639	0.58636
41	N-acetyl-D-proline	0.53681	0.42439	0.42435
42	L-histidinol	0.51137	0.60016	0.60015
43	D-Tyrosine	0.51046	0.84277	0.84304
44	5-Ethyl-2,4-dimethyloxazole	0.48514	0.42999	0.42996
45	2-Aminobutyrate	0.4789	0.60379	0.60382
46	Carnosine	0.43615	0.55204	0.55198
47	D-Tryptophan	0.43034	0.62731	0.62745
48	2E-3-methoxycarbonylpent-2-enedioic acid	0.42005	0.33253	0.3325
49	Inosine	0.4134	0.52531	0.52534
50	1-pyrroline-3-hydroxy-5-carboxylic acid	0.39348	0.90092	0.90089
51	4-Glutamylamino butanoate	0.37803	0.34071	0.34068
52	S-Lactoylglutathione	0.37743	0.32319	0.32316
53	Spermidine	0.37104	1.263	1.2628
54	N1-Acetylspermidine	0.35267	0.28261	0.2826
55	Anserine	0.35127	0.39105	0.39103
56	Guanine	0.31844	0.79693	0.7974
57	Saccharopine	0.29712	0.31685	0.31784
58	maleylacetic acid	0.28631	0.27774	0.27774
59	keto-phenylpyruvic acid	0.28436	0.41438	0.4145
60	D-Methionine	0.28335	0.90377	0.90369
61	5-hydroxymethyl-2-methyl-41H-pyrimidinone	0.27984	0.38597	0.38598
62	Pyridoxine	0.25721	0.21011	0.2101
63	Adenine	0.25685	0.20669	0.20672
64	7,8-diaminononanoic acid	0.24553	0.20405	0.20421
65	L-3-Hydroxykynurenine	0.24226	0.22468	0.22472
66	Cinnamic acid	0.23478	0.20892	0.20893
67	2-Aminoacrylic acid	0.22743	0.36449	0.36448
68	Pyridoxamine	0.21158	0.32229	0.32239
69	Adenosine 2'-phosphate	0.1873	0.1867	0.18755
70	N,N-dimethylformamide	0.18592	0.46204	0.46202
71	Nicotinamide ribotide	0.18205	0.58098	0.58095
72	Methioninesulfoxide	0.18076	0.42065	0.42062
73	D-Phenylalanine	0.16944	0.89414	0.89463
74	4-Methylthiazoleethanol	0.14483	0.15336	0.15342
75	Citrulline	0.14334	0.20324	0.20323
76	Nicotinic acid	0.12583	0.4826	0.48268
77	1-Methyladenosine	0.12113	0.096904	0.09701
78	L-Aspartic acid	0.073807	0.56142	0.56146
79	Pantetheine 4'-phosphate	0.072294	0.27535	0.27532
80	D-Proline	0.065648	0.27779	0.27883
81	Dimethyl-L-arginine	0.058554	0.13114	0.13118
82	2-3-Carboxy-3-aminopropyl-L-histidine	0.05183	0.081714	0.082284
83	Diaminopimelic acid	0.024985	0.071534	0.071766
84	Guanosine	0.010323	0.33818	0.33927

## Sheet: Table S5
Table S5.
	Peaks(mz/rt)	Comp. 1	Comp. 2	Comp. 3
1	Glycerophosphocholine	2.8897	3.1982	3.1737
2	2'-Deoxyguanosine	3.1818	2.8107	2.8144
3	Glutathione	2.5245	2.3904	2.3814
4	N-Acetylornithine	2.3629	2.3293	2.3154
5	Gamma-Glutamylcysteine	2.1478	2.3291	2.3116
6	Acetyllysine	2.0462	2.2626	2.2506
7	Guanine	2.8268	1.8802	1.8769
8	Guanosine	2.4485	1.7389	1.7325
9	Ornithine	1.5486	1.9467	1.9322
10	N-Acetyl-DL-serine	1.9357	1.5512	1.5426
11	D-Histidine	1.6961	1.1799	1.1713
12	Betaine	1.1492	1.9255	1.9151
13	Pantothenic acid	1.1567	1.0652	1.0572
14	D-Glutamine	1.0089	1.2433	1.2354
15	Acetylcarnitine DL	1.2774	0.84844	0.84632
16	D-Serine	0.93247	0.79274	0.7878
17	R-Carnitine	0.92813	0.78473	0.81569
18	Nicotinamide ribotide	0.95155	0.7579	0.76685
19	Saccharopine	0.91451	0.75162	0.76924
20	Cytidine	1.125	0.74881	0.74385
21	D-Threonine	0.84593	0.69891	0.7195
22	Spermidine	0.6038	1.0931	1.0989
23	L-Cystathionine	0.8614	0.60803	0.60339
24	Dethiobiotin	0.73441	0.59415	0.60044
25	L-histidinol	0.8087	0.59543	0.59211
26	L-Arginine	0.57756	1.5285	1.5222
27	D-Alanine	0.6879	0.55177	0.54857
28	7,8-diaminononanoic acid	0.81078	0.55196	0.54789
29	2'-Deoxyadenosine	0.58921	0.5339	0.54133
30	N-Acetylputrescine	0.54676	0.52991	0.52588
31	Methioninesulfoxide	0.52193	0.79567	0.79007
32	Niacinamide	0.51986	0.98952	1.0019
33	5'-S-methyl-5'-thioadenosine	0.77014	0.51725	0.51366
34	D-Methionine	0.5313	0.51025	0.54096
35	Ethyl-2-butenoate	0.55282	0.49075	0.49754
36	Dimethyl-L-arginine	0.62697	0.47929	0.47704
37	D-Tyrosine	0.47323	0.54535	0.61373
38	L-gamma-Glutamyl-L-alanine	0.54174	0.46905	0.47361
39	O-Succinyl-L-homoserine	0.64409	0.45536	0.45302
40	5-Ethyl-2,4-dimethyloxazole	0.44999	0.48813	0.4852
41	1-pyrroline-3-hydroxy-5-carboxylic acid	0.4279	0.53746	0.53337
42	N-acetyl-D-proline	0.55609	0.40824	0.40582
43	2-3-Carboxy-3-aminopropyl-L-histidine	0.39932	0.42902	0.43638
44	L-Aspartic acid	0.4642	0.36891	0.38885
45	1-Methyladenosine	0.36041	0.42291	0.42166
46	N,N-dimethylformamide	0.41074	0.34446	0.35573
47	4-Hydroxy-L-threonine	0.34087	0.39693	0.42081
48	2-Aminoacrylic acid	0.41327	0.33994	0.34244
49	Pantetheine 4'-phosphate	0.32335	0.37672	0.37485
50	4-Glutamylamino butanoate	0.39789	0.30677	0.30561
51	D-Proline	0.30149	0.88865	0.90856
52	S-Lactoylglutathione	0.42255	0.29261	0.29124
53	S-Adenosylhomocysteine	0.28807	0.28633	0.29011
54	Pyridoxamine	0.28615	0.54031	0.54158
55	Nicotinic acid	0.40709	0.28309	0.29677
56	Adenine	0.33927	0.28017	0.28119
57	N1-Acetylspermidine	0.37909	0.26986	0.26781
58	Anserine	0.27293	0.2585	0.2619
59	D-Tryptophan	0.25417	0.28019	0.33255
60	Nomega-L-argininosuccinic acid	0.23795	0.31877	0.32385
61	3-indol-3-ylpyruvic acid	0.32422	0.21671	0.23634
62	Uridine	0.19106	0.33783	0.34192
63	Inosine	0.26942	0.17915	0.17809
64	2-Aminobutyrate	0.16918	0.60115	0.59701
65	keto-phenylpyruvic acid	0.16765	0.21263	0.24593
66	Pyridoxine	0.21967	0.16599	0.16475
67	5-hydroxymethyl-2-methyl-41H-pyrimidinone	0.15985	0.21375	0.2205
68	DL-Pipecolic acid	0.14753	0.6571	0.65296
69	Ethyl 2-pyrrolecarboxylate	0.21249	0.14661	0.16834
70	Adenosine 2'-phosphate	0.19557	0.14341	0.16101
71	D-Asparagine	0.14167	1.7285	1.7155
72	Citrulline	0.1292	0.1288	0.1296
73	L-3-Hydroxykynurenine	0.11477	0.17023	0.1741
74	Thiamine monophosphate	0.10695	0.14873	0.15035
75	Norleucine	0.10317	0.58694	0.7064
76	4-deoxypyridoxine	0.12394	0.09578	0.11585
77	D-Phenylalanine	0.087163	0.23063	0.41978
78	Anthranilate	0.086289	0.41239	0.41052
79	Cinnamic acid	0.094192	0.064362	0.077544
80	2E-3-methoxycarbonylpent-2-enedioic acid	0.062351	0.21218	0.21108
81	Carnosine	0.047856	0.60535	0.60306
82	L-Lysine	0.016969	1.2783	1.2703
83	4-Methylthiazoleethanol	0.007655	0.032632	0.050764
84	Diaminopimelic acid	0.0057925	0.066429	0.085188

## Sheet: Table S6
	Table S6.
		Total	Expected	Hits	Raw p	=-LOG(p)	Holm adjust	FDR	Impact
1	Aminoacyl-tRNA biosynthesis	46	0.99093	8	1.45e-06	13.443	0.000106	0.000106	0.11111
2	Arginine biosynthesis	18	0.38776	4	0.00039	7.8483	0.0281	0.0143	0.36636
3	Alanine, aspartate and glutamate metabolism	22	0.47392	3	0.0101	4.5967	0.716	0.196	0.19424
4	Cyanoamino acid metabolism	8	0.17234	2	0.0114	4.4739	0.798	0.196	0
5	Arginine and proline metabolism	25	0.53855	3	0.0145	4.2367	0.997	0.196	0.36646
6	Glutathione metabolism	26	0.56009	3	0.0161	4.1278	1	0.196	0.04418
7	Nitrogen metabolism	5	0.10771	1	0.103	2.2692	1	0.959	0
8	Glyoxylate and dicarboxylate metabolism	26	0.56009	2	0.105	2.2526	1	0.959	0.0241
9	Glycine, serine and threonine metabolism	32	0.68934	2	0.149	1.9058	1	1	0.30324
10	beta-Alanine metabolism	11	0.23696	1	0.214	1.5413	1	1	0
11	Nicotinate and nicotinamide metabolism	12	0.2585	1	0.231	1.4643	1	1	0.15432
12	Sphingolipid metabolism	13	0.28005	1	0.248	1.3942	1	1	0
13	Lysine degradation	15	0.32313	1	0.281	1.2709	1	1	0
14	Lysine biosynthesis	16	0.34467	1	0.296	1.2162	1	1	0
15	Histidine metabolism	18	0.38776	1	0.327	1.1181	1	1	0
16	Valine, leucine and isoleucine biosynthesis	20	0.43084	1	0.356	1.0323	1	1	0
17	Methane metabolism	23	0.49546	1	0.398	0.92159	1	1	0.26063
18	Glycerophospholipid metabolism	32	0.68934	1	0.508	0.677	1	1	0.05632
19	Pyrimidine metabolism	34	0.73243	1	0.53	0.63507	1	1	0
20	Cysteine and methionine metabolism	41	0.88322	1	0.599	0.51236	1	1	0.01583
21	Purine metabolism	62	1.3356	1	0.753	0.28324	1	1	0

## Sheet: Table S7
	Table S7.
		Total	Expected	Hits	Raw p	=-LOG(p)	Holm adjust	FDR	Impact
1	Aminoacyl-tRNA biosynthesis	46	1.0952	6	0.00043425	7.7419	0.0317	0.021443	0.11111
2	Arginine biosynthesis	18	0.42857	4	0.00058748	7.4397	0.042298	0.021443	0.36636
3	Glutathione metabolism	26	0.61905	4	0.0025318	5.9788	0.17976	0.061607	0.44177
4	Alanine, aspartate and glutamate metabolism	22	0.52381	3	0.013399	4.3126	0.93795	0.2026	0.19424
5	Cyanoamino acid metabolism	8	0.19048	2	0.013876	4.2776	0.95747	0.2026	0
6	Arginine and proline metabolism	25	0.59524	3	0.019108	3.9577	1	0.23247	0.36646
7	Nitrogen metabolism	5	0.11905	1	0.11376	2.1737	1	1	0
8	Glyoxylate and dicarboxylate metabolism	26	0.61905	2	0.12457	2.0829	1	1	0.0241
9	Glycine, serine and threonine metabolism	32	0.7619	2	0.17473	1.7445	1	1	0.19886
10	beta-Alanine metabolism	11	0.2619	1	0.23403	1.4523	1	1	0
11	Nicotinate and nicotinamide metabolism	12	0.28571	1	0.25249	1.3764	1	1	0.15432
12	Cysteine and methionine metabolism	41	0.97619	2	0.25486	1.367	1	1	0.15685
13	Sphingolipid metabolism	13	0.30952	1	0.27054	1.3073	1	1	0
14	Histidine metabolism	18	0.42857	1	0.3547	1.0365	1	1	0
15	Methane metabolism	23	0.54762	1	0.42957	0.84497	1	1	0.26063
16	Tryptophan metabolism	30	0.71429	1	0.52061	0.65276	1	1	0
17	Glycerophospholipid metabolism	32	0.7619	1	0.54396	0.60888	1	1	0.05632
18	Pyrimidine metabolism	34	0.80952	1	0.56623	0.56876	1	1	0
19	Purine metabolism	62	1.4762	1	0.78753	0.23886	1	1	0

## Sheet: Table S8
	Table S8.
		Total	Expected	Hits	Raw p	=-LOG(p)	Holm adjust	FDR	Impact
1	Glutathione metabolism	26	0.58957	4	0.0020915	6.1699	0.15268	0.097288	0.45582
2	Aminoacyl-tRNA biosynthesis	46	1.0431	5	0.0026654	5.9274	0.19191	0.097288	0.11111
3	Arginine biosynthesis	18	0.40816	3	0.006557	5.0272	0.46554	0.15955	0.36636
4	Arginine and proline metabolism	25	0.56689	2	0.10734	2.2318	1	1	0.21739
5	Glycine, serine and threonine metabolism	32	0.72562	2	0.16162	1.8225	1	1	0.19886
6	Cyanoamino acid metabolism	8	0.18141	1	0.16826	1.7822	1	1	0
7	beta-Alanine metabolism	11	0.24943	1	0.22412	1.4956	1	1	0
8	Cysteine and methionine metabolism	41	0.92971	2	0.23719	1.4389	1	1	0.15685
9	Nicotinate and nicotinamide metabolism	12	0.27211	1	0.24194	1.4191	1	1	0.15432
10	Sphingolipid metabolism	13	0.29478	1	0.25937	1.3495	1	1	0
11	Lysine degradation	15	0.34014	1	0.29309	1.2273	1	1	0
12	Lysine biosynthesis	16	0.36281	1	0.30939	1.1731	1	1	0
13	Histidine metabolism	18	0.40816	1	0.34094	1.076	1	1	0
14	Pantothenate and CoA biosynthesis	20	0.45351	1	0.37112	0.99124	1	1	0.12467
15	Alanine, aspartate and glutamate metabolism	22	0.49887	1	0.39998	0.91635	1	1	0
16	Methane metabolism	23	0.52154	1	0.41393	0.88206	1	1	0.26063
17	Glyoxylate and dicarboxylate metabolism	26	0.58957	1	0.45397	0.78973	1	1	0.0241
18	Tryptophan metabolism	30	0.68027	1	0.50332	0.68653	1	1	0
19	Glycerophospholipid metabolism	32	0.72562	1	0.52638	0.64173	1	1	0.05632
20	Purine metabolism	62	1.4059	1	0.77106	0.25999	1	1	0

## Sheet: Table S9
	Table S9.
		Total	Expected	Hits	Raw p	=-LOG(p)	Holm adjust	FDR	Impact
1	Arginine biosynthesis	18	0.30612	3	0.0027912	5.8813	0.20375	0.20375	0.26545
2	Glutathione metabolism	26	0.44218	3	0.0081881	4.8051	0.58954	0.29887	0.42972
3	Purine metabolism	62	1.0544	4	0.01681	4.0858	1	0.40904	0.01446
4	Nitrogen metabolism	5	0.085034	1	0.082371	2.4965	1	1	0
5	beta-Alanine metabolism	11	0.18707	1	0.17285	1.7553	1	1	0
6	Aminoacyl-tRNA biosynthesis	46	0.78231	2	0.18178	1.7049	1	1	0
7	Histidine metabolism	18	0.30612	1	0.26787	1.3173	1	1	0
8	Pantothenate and CoA biosynthesis	20	0.34014	1	0.29309	1.2273	1	1	0.12467
9	Alanine, aspartate and glutamate metabolism	22	0.37415	1	0.31749	1.1473	1	1	0.19424
10	Arginine and proline metabolism	25	0.42517	1	0.35262	1.0424	1	1	0.21739
11	Glyoxylate and dicarboxylate metabolism	26	0.44218	1	0.36395	1.0107	1	1	0
12	Glycerophospholipid metabolism	32	0.54422	1	0.42814	0.8483	1	1	0.05632
13	Pyrimidine metabolism	34	0.57823	1	0.44816	0.8026	1	1	0

## Sheet: Table S10
Table S10.
Ethanol concentration	ACT1	mtCOX	DAL2	FAS1	ICL1	ITS	LSU	mtSSU	RPB1	RPB2	SSU	TEF-1α	ITS-LSU
0	0.071887	0.0141207	0.0500642	0	0.00641849	0	0	0	0.00641849	0.0949936	0	0	0
0.08	0.0154044	0	0.0641849	0	0	0	0	0.0346598	0	0.240051	0	0	0
0.12	0.0115533	0.0179718	0.0218228	0	0.0012837	0	0.0102696	0.0231065	0.0012837	0.160462	0.0166881	0.0179718	0
0.16	0.223363	0.0346598	0.318357	0.0205392	0.0770218	0.0192555	0.0629012	0.0205392	0.0744544	0.0218228	0.0243902	0.0243902	0

[truncated: 2 more sheets: Table S11, Table S12]
